# Supplementary material
Source: PubMed Central journal article supplement (PMC4896395)
Supplement: NIHMS781807-supplement-1.pdf [file NIHMS781807-supplement-1.pdf]

# Assessing the Perceived Difficulty of Open Liver Resections I

## 1. In what country to you practice surgery?

## 2. Approximately how many liver resections do you perform per year?

- 0-25
- 25-50
- 50-75
- 75-100
- >100

## 3. Approximately how many liver resections have you performed in your career?

- 0-250
- 250-500
- 500-1000
- >1000
